# Supplementary material for: Efficacy and safety of radiofrequency treatment for improving knee pain and function in knee osteoarthritis: a meta-analysis of randomized controlled trials
Source: Springer Nature journal article supplement (doi:10.1186/s13018-021-02906-4), 2022-01-15
Supplement: MOESM1 [file 20035254]

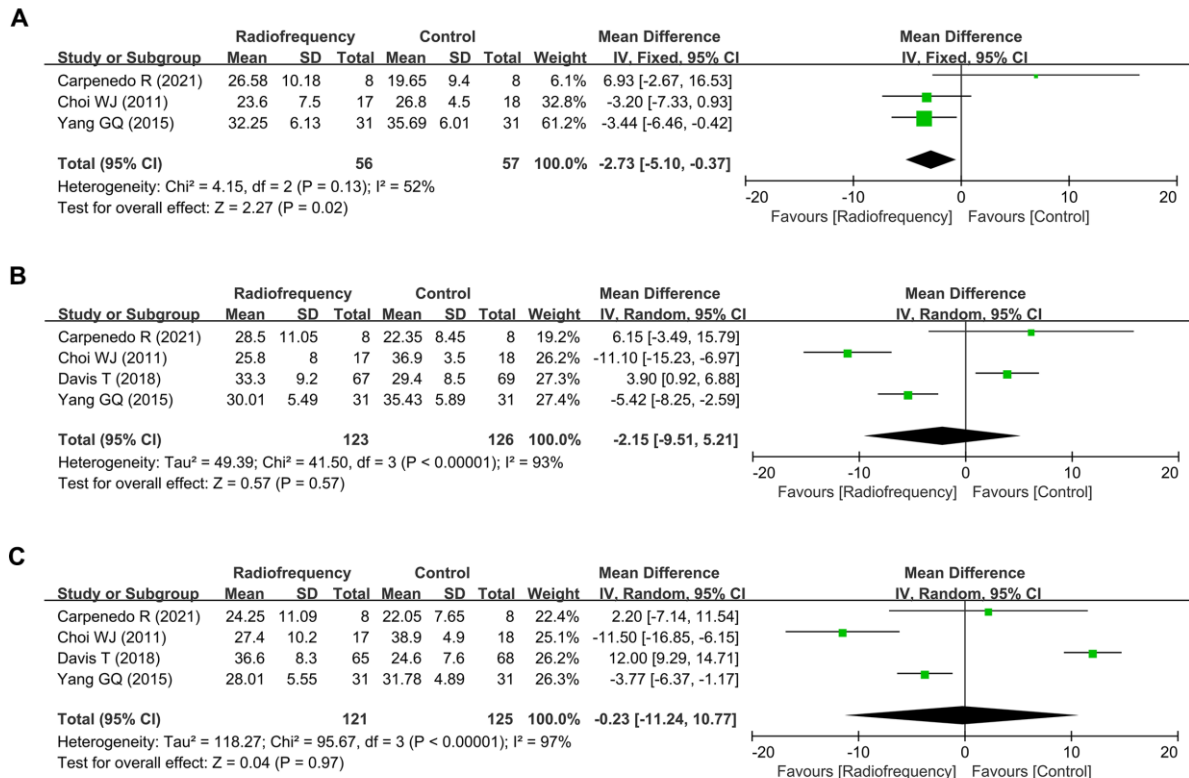

**Supplementary Figure 1.** Forest plots for the assessment of OKS score between the radiofrequency group and control group. At (a) 1-2 weeks, (b) 4 weeks, and (c) 12 weeks. OKS, Oxford knee score; SD, standard deviation; CI, confidence interval.

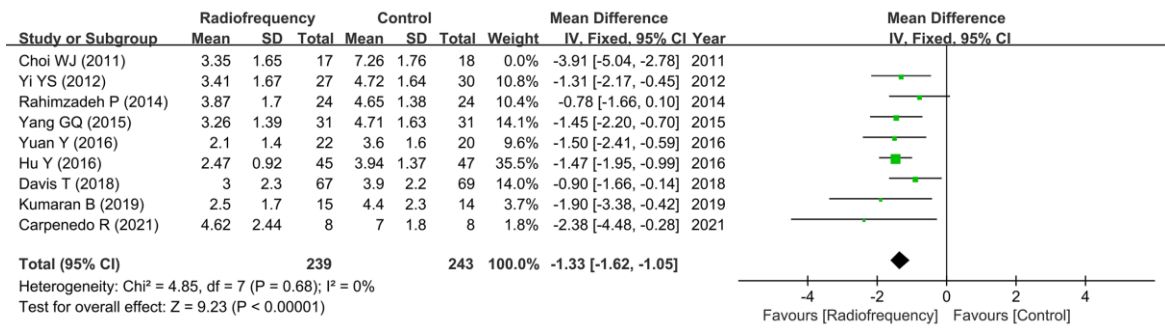

**Supplementary Figure 2.** Sensitivity analysis for the assessment of pain scores at 4

weeks after treatment. SD, standard deviation; CI, confidence interval.

**Supplementary Table 1.** Subgroup Analysis of the WMD of pain scores between two groups at 4 weeks after treatment

| Outcomes                | No. of trials | WMD<br>(95% CI)         | Z-value | P      | Heterogeneity      |        |
|-------------------------|---------------|-------------------------|---------|--------|--------------------|--------|
|                         |               |                         |         |        | I <sup>2</sup> (%) | P      |
| RF mode                 |               |                         |         |        |                    |        |
| RFA                     | 3             | -2.17<br>[-3.61, -0.73] | 2.95    | 0.003  | 87                 | 0.005  |
| Others                  | 6             | -1.31<br>[-1.64, -0.99] | 7.88    | <0.001 | 0                  | 0.45   |
| Location                |               |                         |         |        |                    |        |
| Asia                    | 6             | -1.66<br>[-2.32, -1.01] | 5.00    | <0.001 | 75                 | 0.001  |
| Others                  | 3             | -1.37<br>[-2.22, -0.52] | 3.16    | 0.002  | 25                 | 0.26   |
| Site of radiofrequency  |               |                         |         |        |                    |        |
| Genicular nerve         | 4             | -1.83<br>[-2.93, -0.72] | 3.24    | 0.001  | 85                 | <0.001 |
| Intra-articular         | 5             | -1.41<br>[-1.77, -1.05] | 7.62    | <0.001 | 0                  | 0.50   |
| Diagnosed nerve block   |               |                         |         |        |                    |        |
| Yes                     | 3             | -2.37<br>[-4.53, -0.21] | 2.15    | 0.03   | 90                 | <0.001 |
| No                      | 6             | -1.38<br>[-1.69, -1.07] | 8.78    | <0.001 | 0                  | 0.77   |
| Sex ratio (female/male) |               |                         |         |        |                    |        |
| < 2                     | 5             | -1.27<br>[-1.67, -0.87] | 6.24    | <0.001 | 12                 | 0.34   |
| ≥ 2                     | 2             | -2.68<br>[-5.04, -0.32] | 2.23    | 0.03   | 91                 | 0.001  |
| BMI                     |               |                         |         |        |                    |        |
| < 30                    | 3             | -2.55<br>[-4.34, 0.77]  | 2.81    | 0.005  | 87                 | <0.001 |
| ≥ 30                    | 2             | -1.19<br>[-2.08, -0.30] | 2.62    | 0.009  | 28                 | 0.24   |

WMD, weighted mean difference; RF, radiofrequency; RFA, radiofrequency ablation; BMI, body mass index;

**Supplementary Table 2.** Subgroup Analysis of the WMD of pain scores between two groups at 12 weeks after treatment

| Outcomes                | No. of trials | WMD<br>(95% CI)         | Z-value | P      | Heterogeneity      |        |
|-------------------------|---------------|-------------------------|---------|--------|--------------------|--------|
|                         |               |                         |         |        | I <sup>2</sup> (%) | P      |
| RF mode                 |               |                         |         |        |                    |        |
| RFA                     | 6             | -2.26<br>[-2.89, -1.63] | 7.02    | <0.001 | 88                 | <0.001 |
| Others                  | 5             | -1.12<br>[-2.21, -0.04] | 2.03    | 0.04   | 76                 | 0.002  |
| Location                |               |                         |         |        |                    |        |
| Asia                    | 8             | -1.81<br>[-2.49, -1.14] | 5.29    | <0.001 | 91                 | <0.001 |
| Others                  | 3             | -2.08<br>[-2.86, -1.30] | 5.25    | <0.001 | 11                 | 0.33   |
| Site of radiofrequency  |               |                         |         |        |                    |        |
| Genicular nerve         | 6             | -2.32<br>[-2.95, -1.68] | 7.16    | <0.001 | 88                 | <0.001 |
| Intra-articular         | 5             | -1.04<br>[-1.98, -0.11] | 2.19    | 0.03   | 70                 | 0.009  |
| Diagnosed nerve block   |               |                         |         |        |                    |        |
| Yes                     | 3             | -2.65<br>[-3.57, -1.73] | 5.65    | <0.001 | 37                 | 0.20   |
| No                      | 8             | -1.58<br>[-2.26, -0.90] | 4.52    | <0.001 | 91                 | <0.001 |
| Sex ratio (female/male) |               |                         |         |        |                    |        |
| < 2                     | 5             | -1.61<br>[-2.57, -0.65] | 3.28    | 0.001  | 84                 | <0.001 |
| ≥ 2                     | 4             | -2.38<br>[-3.53, -1.23] | 4.04    | <0.001 | 90                 | <0.001 |
| BMI                     |               |                         |         |        |                    |        |
| < 30                    | 2             | -2.79<br>[-4.73, -0.84] | 2.81    | 0.005  | 54                 | 0.14   |
| ≥ 30                    | 3             | -2.41<br>[-2.72, 2.11]  | 15.46   | <0.001 | 17                 | 0.30   |

WMD, weighted mean difference; RF, radiofrequency; RFA, radiofrequency ablation; BMI, body mass index;
